# Supplementary material
Source: Springer Nature journal article supplement (https://www.springermedizin.de/resource/supplementary/12955_2009_636_MOESM8_ESM.pdf/9560916)

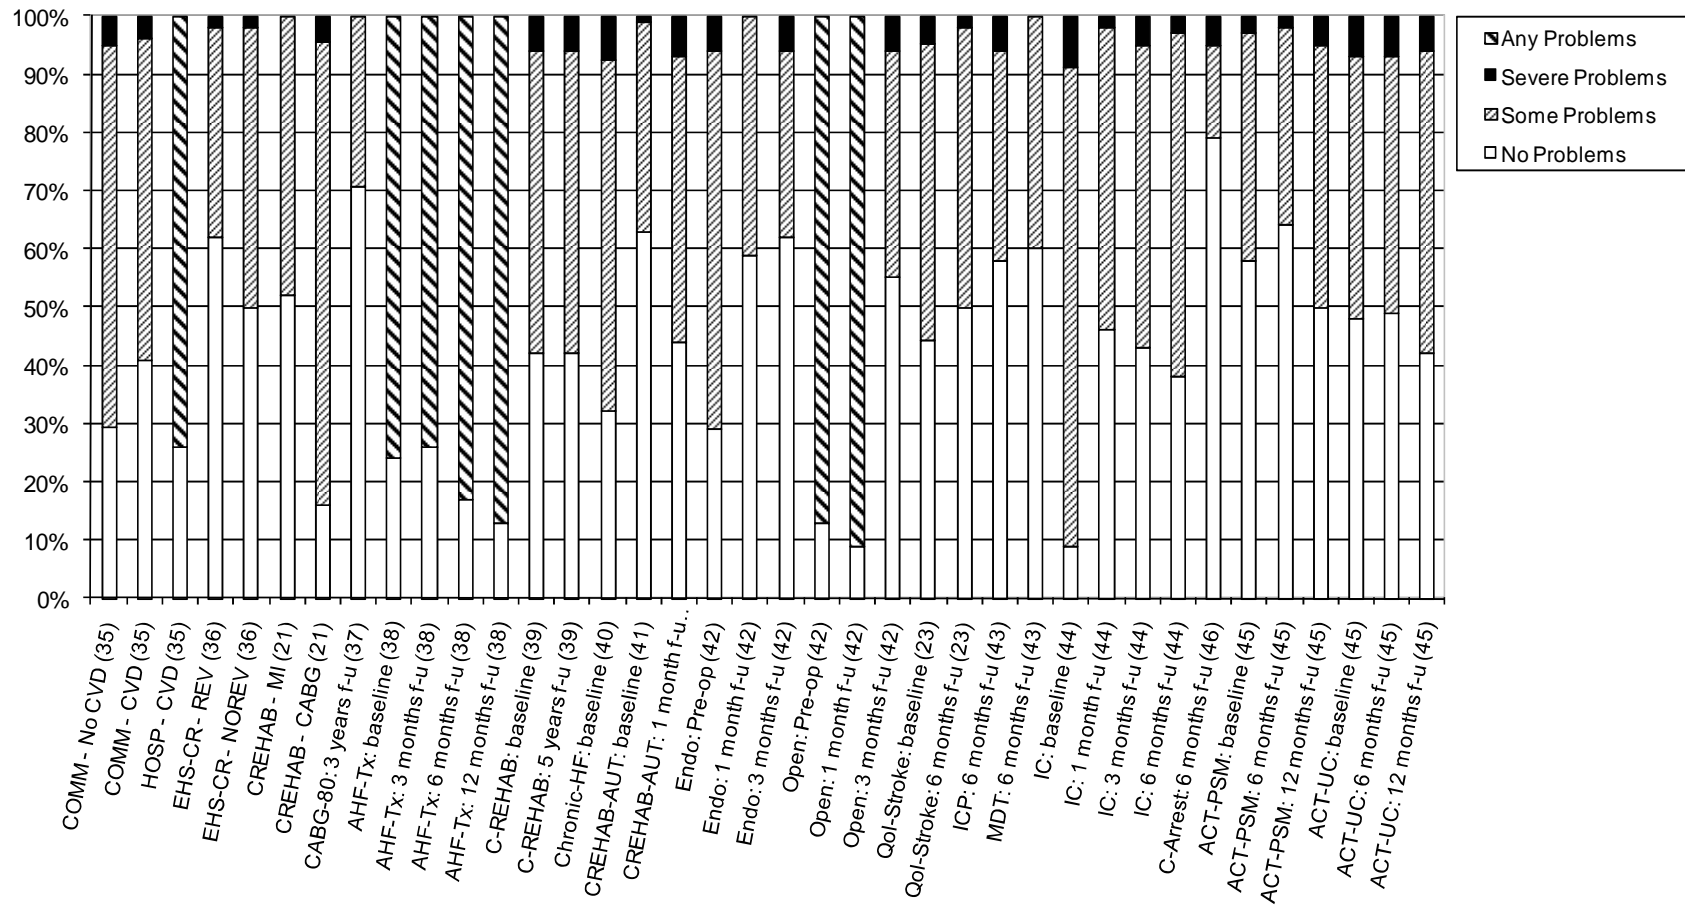

Supplement: MOESM8 [file 9560916]
